# Supplementary material for: Impact of CYP3A4*1G Allele on Clinical Pharmacokinetics and Pharmacodynamics of Clopidogrel
Source: PubMed Central journal article supplement — Eur J Drug Metab Pharmacokinet. 2016 Feb 18;42(1):99–107. doi: 10.1007/s13318-016-0324-7 (PMC5306247; doi:10.1007/s13318-016-0324-7), 2016-02-18
Supplement: 13318_2016_324_MOESM1_ESM.pdf [file 13318_2016_324_MOESM1_ESM.pdf]

Online Resource 1. Results of a multivariate analysis of the influence of CYP3A4\*1G and other covariates on log  $C_{max}$  and log  $AUC_{0-t}$  of H3 metabolite. P value lower than 0.05 was considered significant.

| Pharmacokinetic parameter (DV) | Covariates (IDV) | B      | p value of a covariate | r <sup>2</sup> of a model | p value of a model |
|--------------------------------|------------------|--------|------------------------|---------------------------|--------------------|
| log $AUC_{0-t}$ H3             | <i>CYP3A4*1G</i> | 0.017  | 0.931                  | 0.052                     | 0.213              |
|                                | Age              | 0.360  | 0.084                  |                           |                    |
|                                | <i>CYP3A4*1G</i> | 0.067  | 0.752                  | -0.044                    | 0.618              |
|                                | Gender           | -0.204 | 0.341                  |                           |                    |
|                                | <i>CYP3A4*1G</i> | -0.081 | 0.697                  | 0.077                     | 0.158              |
|                                | BMI              | -0.409 | 0.059                  |                           |                    |
|                                | <i>CYP3A4*1G</i> | 0.071  | 0.744                  | -0.066                    | 0.778              |
|                                | DM               | -0.147 | 0.501                  |                           |                    |
|                                | <i>CYP3A4*1G</i> | 0.034  | 0.872                  | -0.079                    | 0.957              |
|                                | Type of statin   | 0.055  | 0.791                  |                           |                    |
|                                | <i>CYP3A4*1G</i> | 0.018  | 0.929                  | -0.075                    | 0.915              |
|                                | PPI              | 0.082  | 0.690                  |                           |                    |
|                                | <i>CYP3A4*1G</i> | 0.027  | 0.895                  | -0.082                    | 0.989              |
|                                | CCB              | 0.027  | 0.938                  |                           |                    |
| <i>CYP3A4*1G</i>               | -0.028           | 0.893  | -0.063                 | 0.204                     |                    |
| CYP2C19 phenotype              | -0.116           | 0.580  |                        |                           |                    |
| log $C_{max}$ H3               | <i>CYP3A4*1G</i> | 0.127  | 0.507                  | 0.083                     | 0.135              |
|                                | Age              | 0.360  | 0.068                  |                           |                    |
|                                | <i>CYP3A4*1G</i> | 0.171  | 0.401                  | -0.036                    | 0.587              |
|                                | Gender           | -0.136 | 0.503                  |                           |                    |
|                                | <i>CYP3A4*1G</i> | -0.007 | 0.969                  | 0.201                     | 0.026              |
|                                | BMI              | -0.415 | 0.070                  |                           |                    |
|                                | <i>CYP3A4*1G</i> | 0.176  | 0.395                  | -0.044                    | 0.642              |
|                                | DM               | -0.107 | 0.601                  |                           |                    |
|                                | <i>CYP3A4*1G</i> | -0.170 | 0.429                  | -0.044                    | 0.618              |
|                                | Type of statin   | -0.145 | 0.498                  |                           |                    |
|                                | <i>CYP3A4*1G</i> | -0.126 | 0.540                  | 0.020                     | 0.307              |
|                                | PPI              | -0.283 | 0.177                  |                           |                    |
|                                | <i>CYP3A4*1G</i> | -0.141 | 0.514                  | -0.062                    | 0.751              |
|                                | CCB              | 0.060  | 0.779                  |                           |                    |
| <i>CYP3A4*1G</i>               | -0.066           | 0.731  | 0.140                  | 0.068                     |                    |
| CYP2C19 phenotype              | -0.436           | 0.032  |                        |                           |                    |

DV – dependent value, IDV – independent value, BMI – body mass index, DM – diabetes mellitus,

PPI – proton pump inhibitor, CCB – calcium channel blocker

Online Resource 2. Results of a multivariate analysis of the influence of CYP3A4\*1G and other covariates on log  $C_{max}$  and log  $AUC_{0-t}$  of H4 metabolite. P value lower than 0.05 was considered significant.

| Pharmacokinetic parameter (DV) | Covariates (IDV) | B      | p value of a covariate | r <sup>2</sup> of a model | p value of a model |
|--------------------------------|------------------|--------|------------------------|---------------------------|--------------------|
| log $AUC_{0-t}$ H4             | <i>CYP3A4*1G</i> | -0.129 | 0.325                  |                           |                    |
|                                | Age              | 0.218  | 0.557                  | -0.029                    | 0.515              |
|                                | <i>CYP3A4*1G</i> | -0.080 | 0.712                  | 0.011                     | 0.346              |
|                                | Gender           | -0.294 | 0.187                  |                           |                    |
|                                | <i>CYP3A4*1G</i> | -0.231 | 0.304                  | 0.035                     | 0.268              |
|                                | BMI              | -0.342 | 0.134                  |                           |                    |
|                                | <i>CYP3A4*1G</i> | -0.098 | 0.670                  | -0.066                    | 0.734              |
|                                | DM               | -0.122 | 0.598                  |                           |                    |
|                                | <i>CYP3A4*1G</i> | -0.170 | 0.429                  | -0.044                    | 0.618              |
|                                | Type of statin   | -0.145 | 0.498                  |                           |                    |
|                                | <i>CYP3A4*1G</i> | -0.126 | 0.540                  | 0.020                     | 0.307              |
|                                | PPI              | -0.283 | 0.177                  |                           |                    |
|                                | <i>CYP3A4*1G</i> | -0.141 | 0.514                  | -0.062                    | 0.751              |
| CCB                            | 0.060            | 0.779  |                        |                           |                    |
| <i>CYP3A4*1G</i>               | -0.066           | 0.731  | 0.140                  | 0.068                     |                    |
| CYP2C19 phenotype              | -0.436           | 0.032  |                        |                           |                    |
| log $C_{max}$ H4               | <i>CYP3A4*1G</i> | 0.014  | 0.944                  | 0.017                     | 0.309              |
|                                | Age              | 0.303  | 0.133                  |                           |                    |
|                                | <i>CYP3A4*1G</i> | 0.071  | 0.719                  | 0.022                     | 0.239              |
|                                | Gender           | -0.311 | 0.124                  |                           |                    |
|                                | <i>CYP3A4*1G</i> | -0.095 | 0.637                  | 0.089                     | 0.125              |
|                                | BMI              | -0.419 | 0.064                  |                           |                    |
|                                | <i>CYP3A4*1G</i> | 0.076  | 0.711                  | -0.033                    | 0.569              |
|                                | DM               | -0.214 | 0.301                  |                           |                    |
|                                | <i>CYP3A4*1G</i> | 0.007  | 0.974                  | -0.068                    | 0.866              |
|                                | Type of statin   | -0.105 | 0.606                  |                           |                    |
|                                | <i>CYP3A4*1G</i> | 0.040  | 0.837                  | -0.015                    | 0.460              |
|                                | PPI              | -0.245 | 0.219                  |                           |                    |
|                                | <i>CYP3A4*1G</i> | 0.019  | 0.926                  | -0.077                    | 0.971              |
| CCB                            | -0.042           | 0.839  |                        |                           |                    |
| <i>CYP3A4*1G</i>               | 0.122            | 0.505  | 0.137                  | 0.056                     |                    |
| CYP2C19 phenotype              | -0.459           | 0.017  |                        |                           |                    |

DV – dependent value, IDV – independent value, BMI – body mass index, DM – diabetes mellitus,

PPI – proton pump inhibitor, CCB – calcium channel blocker

Online Resource 3. Results of a multivariate analysis of the influence of CYP3A4\*1G and other covariates on log AUC<sub>aggr</sub> measured by means of the Multiplate method. P value lower than 0.05 was considered significant.

| Platelet aggregation (DV) | Covariates (IDV) | B      | p value of a covariate | r <sup>2</sup> of a model | p value of a model |
|---------------------------|------------------|--------|------------------------|---------------------------|--------------------|
| logAUC <sub>aggr</sub>    | <i>CYP3A4*1G</i> | 0.074  | 0.679                  | 0.022                     | 0.276              |
|                           | Age              | -0.289 | 0.116                  |                           |                    |
|                           | <i>CYP3A4*1G</i> | -0.002 | 0.993                  | 0.043                     | 0.200              |
|                           | Gender           | 0.324  | 0.078                  |                           |                    |
|                           | <i>CYP3A4*1G</i> | -0.010 | 0.956                  | -0.069                    | 0.933              |
|                           | BMI              | -0.073 | 0.714                  |                           |                    |
|                           | <i>CYP3A4*1G</i> | 0.015  | 0.934                  | 0.044                     | 0.198              |
|                           | DM               | 0.323  | 0.077                  |                           |                    |
|                           | <i>CYP3A4*1G</i> | 0.017  | 0.930                  | -0.055                    | 0.826              |
|                           | Type of statin   | -0.108 | 0.578                  |                           |                    |
|                           | <i>CYP3A4*1G</i> | 0.079  | 0.668                  | -0.005                    | 0.411              |
|                           | PPI              | -0.241 | 0.194                  |                           |                    |
|                           | <i>CYP3A4*1G</i> | 0.044  | 0.813                  | -0.064                    | 0.932              |
|                           | CCB              | 0.051  | 0.785                  |                           |                    |
| <i>CYP3A4*1G</i>          | 0.027            | 0.877  | 0.056                  | 0.164                     |                    |
| CYP2C19 phenotype         | 0.340            | 0.062  |                        |                           |                    |

DV – dependent value, IDV – independent value, BMI – body mass index, DM – diabetes mellitus, PPI – proton pump inhibitor, CCB – calcium channel blocker
